# Supplementary material for: Antithrombotic Therapy in Patients With Atrial Fibrillation and Coronary Artery Disease With Recent or Remote Events: Systematic Review and Meta-analysis
Source: PubMed Central journal article supplement — CJC Open. 2024 Jan 12;6(5):708–20. doi: 10.1016/j.cjco.2024.01.001 (PMC11150964; doi:10.1016/j.cjco.2024.01.001), 2024-01-12
Supplement: mmc1.pdf [file mmc1.pdf]

**SUPPLEMENTARY MATERIAL**

**Supplemental Appendix S1. Search Terms for MEDLINE, Embase, and CENTRAL.**

**(A) Search for existing systematic reviews**

|                                       |
|---------------------------------------|
| <b>Pubmed (Ovid)</b>                  |
| January 1, 2019 to October 1, 2022    |
| 1. atrial fibrillation                |
| 2. coronary artery disease            |
| 3. percutaneous coronary intervention |
| <b>4. 2 OR 3</b>                      |
| 5. antiplatelet                       |
| 6. antithrombotic                     |
| 7. anticoagul*                        |
| <b>9. 4 OR 5 OR 6</b>                 |
| 10. meta-analysis                     |
| <b>11. 1 AND 4 AND 9 AND 10</b>       |

**(B) Search for randomized controlled trials: Dual-Pathway therapy versus triple antithrombotic therapy in AF plus PCI or medically-managed ACS**

| <b>Pubmed (Ovid)</b>                                                | <b>Embase (Ovid)</b>                                                | <b>CENTRAL (Ovid)</b>                                               |
|---------------------------------------------------------------------|---------------------------------------------------------------------|---------------------------------------------------------------------|
| February 1, 2020 to October 1, 2022                                 |                                                                     |                                                                     |
| 1. AF                                                               | 1. AF                                                               | 1. AF                                                               |
| 2. atrial fibrillation                                              | 2. atrial fibrillation                                              | 2. atrial fibrillation                                              |
| <b>3. 1 OR 2</b>                                                    | <b>3. 1 OR 2</b>                                                    | <b>3. 1 OR 2</b>                                                    |
| 4. coronary stenting                                                | 4. coronary stenting                                                | 4. coronary stenting                                                |
| 5. coronary angioplasty                                             | 5. coronary angioplasty                                             | 5. coronary angioplasty                                             |
| 6. PCI                                                              | 6. PCI                                                              | 6. PCI                                                              |
| 7. percutaneous coronary intervention                               | 7. percutaneous coronary intervention                               | 7. percutaneous coronary intervention                               |
| 8. stenting                                                         | 8. stenting                                                         | 8. stenting                                                         |
| 9. stent                                                            | 9. stent                                                            | 9. stent                                                            |
| 10. drug-eluting stent                                              | 10. drug-eluting stent                                              | 10. drug-eluting stent                                              |
| 11. DES                                                             | 11. DES                                                             | 11. DES                                                             |
| 12. BMS                                                             | 12. BMS                                                             | 12. BMS                                                             |
| 13. bare metal stent                                                | 13. bare metal stent                                                | 13. bare metal stent                                                |
| 14. acute coronary syndrome                                         | 14. acute coronary syndrome                                         | 14. acute coronary syndrome                                         |
| <b>15. 4 OR 5 OR 6 OR 7 OR 8 OR 9 OR 10 OR 11 OR 12 OR 13 OR 14</b> | <b>15. 4 OR 5 OR 6 OR 7 OR 8 OR 9 OR 10 OR 11 OR 12 OR 13 OR 14</b> | <b>15. 4 OR 5 OR 6 OR 7 OR 8 OR 9 OR 10 OR 11 OR 12 OR 13 OR 14</b> |
| 16. antithrombotic therapy                                          | 16. antithrombotic therapy                                          | 16. antithrombotic therapy                                          |
| 17. DAPT                                                            | 17. DAPT                                                            | 17. DAPT                                                            |
| 18. dual antiplatelet therapy                                       | 18. dual antiplatelet therapy                                       | 18. dual antiplatelet therapy                                       |
| 19. clopidogrel                                                     | 19. clopidogrel                                                     | 19. clopidogrel                                                     |
| 20. ticagrelor                                                      | 20. ticagrelor                                                      | 20. ticagrelor                                                      |

|                                                                                                                                                                                                                                                                                                                                                                                |                                                                                                                                                                                                                                                                                                                                                                                |                                                                                                                                                                                                                                                                                                                                                                                |
|--------------------------------------------------------------------------------------------------------------------------------------------------------------------------------------------------------------------------------------------------------------------------------------------------------------------------------------------------------------------------------|--------------------------------------------------------------------------------------------------------------------------------------------------------------------------------------------------------------------------------------------------------------------------------------------------------------------------------------------------------------------------------|--------------------------------------------------------------------------------------------------------------------------------------------------------------------------------------------------------------------------------------------------------------------------------------------------------------------------------------------------------------------------------|
| 21. Prasugrel<br>22. P2Y12 inhibitor<br>23. triple therapy<br>24. antithrombotic drugs<br>25. antiplatelets<br>26. oral anticoagulant<br>27. VKA<br>28. NOAC<br>29. DOAC<br>30. dabigatran<br>31. apixaban<br>32. edoxaban<br>33. rivaroxaban<br><b>34. 17 OR 18 OR 19 OR 20<br/>OR 21 OR 22 OR 23 OR 24<br/>OR 25 OR 26 OR 27 OR 28<br/>OR 29 OR 30 OR 31 OR 32<br/>OR 33</b> | 21. Prasugrel<br>22. P2Y12 inhibitor<br>23. triple therapy<br>24. antithrombotic drugs<br>25. antiplatelets<br>26. oral anticoagulant<br>27. VKA<br>28. NOAC<br>29. DOAC<br>30. dabigatran<br>31. apixaban<br>32. edoxaban<br>33. rivaroxaban<br><b>34. 17 OR 18 OR 19 OR 20<br/>OR 21 OR 22 OR 23 OR 24<br/>OR 25 OR 26 OR 27 OR 28<br/>OR 29 OR 30 OR 31 OR 32<br/>OR 33</b> | 21. Prasugrel<br>22. P2Y12 inhibitor<br>23. triple therapy<br>24. antithrombotic drugs<br>25. antiplatelets<br>26. oral anticoagulant<br>27. VKA<br>28. NOAC<br>29. DOAC<br>30. dabigatran<br>31. apixaban<br>32. edoxaban<br>33. rivaroxaban<br><b>34. 17 OR 18 OR 19 OR 20<br/>OR 21 OR 22 OR 23 OR 24<br/>OR 25 OR 26 OR 27 OR 28<br/>OR 29 OR 30 OR 31 OR 32<br/>OR 33</b> |
| <b>35. 3 AND 15 AND 34<br/>36. Limit 35 “therapy (best<br/>balance of sensitivity and<br/>specificity)”</b>                                                                                                                                                                                                                                                                    | <b>35. 3 AND 15 AND 34<br/>36. Limit 35 “therapy (best<br/>balance of sensitivity and<br/>specificity)”</b>                                                                                                                                                                                                                                                                    | <b>35. 3 AND 15 AND 34</b>                                                                                                                                                                                                                                                                                                                                                     |

**(C) Search for randomized controlled trials: OAC monotherapy versus dual-pathway therapy in AF plus CAD and remote ACS or PCI**

| <b>Pubmed (Ovid)</b><br>June 11, 2020 to October 1, 2022                                                                                                                                 | <b>Embase (Ovid)</b>                                                                                                                                                                     | <b>CENTRAL (Ovid)</b>                                                                                                                                                                    |
|------------------------------------------------------------------------------------------------------------------------------------------------------------------------------------------|------------------------------------------------------------------------------------------------------------------------------------------------------------------------------------------|------------------------------------------------------------------------------------------------------------------------------------------------------------------------------------------|
| 1. stable coronary<br>2. coronary artery disease<br><b>3. 1 OR 2</b>                                                                                                                     | 1. stable coronary<br>2. coronary artery disease<br><b>3. 1 OR 2</b>                                                                                                                     | 1. stable coronary<br>2. coronary artery disease<br><b>3. 1 OR 2</b>                                                                                                                     |
| 4. atrial fibrillation<br>5. a-fib<br>6. a fib<br>7. afib<br><b>8. 5 OR 6 OR 7</b>                                                                                                       | 4. atrial fibrillation<br>5. a-fib<br>6. a fib<br>7. afib<br><b>8. 5 OR 6 OR 7</b>                                                                                                       | 4. atrial fibrillation<br>5. a-fib<br>6. a fib<br>7. afib<br><b>8. 5 OR 6 OR 7</b>                                                                                                       |
| 9. antithrombotic<br>10. oral anticoagulant<br>11. warfarin<br>12. apixaban<br>13. edoxaban<br>14. dabigatran<br>15. rivaroxaban<br><b>16. 9 OR 10 OR 11 OR 12 OR<br/>13 OR 14 OR 15</b> | 9. antithrombotic<br>10. oral anticoagulant<br>11. warfarin<br>12. apixaban<br>13. edoxaban<br>14. dabigatran<br>15. rivaroxaban<br><b>16. 9 OR 10 OR 11 OR 12 OR<br/>13 OR 14 OR 15</b> | 9. antithrombotic<br>10. oral anticoagulant<br>11. warfarin<br>12. apixaban<br>13. edoxaban<br>14. dabigatran<br>15. rivaroxaban<br><b>16. 9 OR 10 OR 11 OR 12 OR<br/>13 OR 14 OR 15</b> |

|                                                                                                                 |                                                                                                                 |                                                        |
|-----------------------------------------------------------------------------------------------------------------|-----------------------------------------------------------------------------------------------------------------|--------------------------------------------------------|
| 17. antiplatelet<br>18. aspirin<br><b>19. 15 OR 16</b>                                                          | 17. antiplatelet<br>18. aspirin<br><b>19. 15 OR 16</b>                                                          | 17. antiplatelet<br>18. aspirin<br><b>19. 15 OR 16</b> |
| <b>20. 3 AND 8 AND 16 AND 19</b><br><b>21. Limit 20 “therapy (best balance of sensitivity and specificity)”</b> | <b>20. 3 AND 8 AND 16 AND 19</b><br><b>21. Limit 20 “therapy (best balance of sensitivity and specificity)”</b> | <b>20. 3 AND 8 AND 16 AND 19</b>                       |

**Supplemental Table S1. AMSTAR 2 ratings of recent relevant meta-analyses**

|                                                                                                                                                                                                                           | Khan et al 2020        | Lopes 2019             | Shurrab 2020           | Cochrane 2019* | Gargiulo 2019          | Lupercio 2020          | Capodan no 2020        |
|---------------------------------------------------------------------------------------------------------------------------------------------------------------------------------------------------------------------------|------------------------|------------------------|------------------------|----------------|------------------------|------------------------|------------------------|
| 1. Did the research questions and inclusion criteria for the review include the components of PICO?                                                                                                                       | yes                    | yes                    | no                     | yes            | yes                    | no                     | yes                    |
| <b>2. Did the report of the review contain an explicit statement that the review methods were established prior to the conduct of the review and did the report justify any significant deviations from the protocol?</b> | No                     | no                     | no                     | yes            | no                     | no                     | yes                    |
| 3. Did the review authors explain their selection of the study designs for inclusion in the review?                                                                                                                       | Yes                    | yes                    | yes                    | yes            | yes                    | yes                    | yes                    |
| <b>4. Did the review authors use a comprehensive literature search strategy?</b>                                                                                                                                          | partial yes            | partial yes            | partial yes            | yes            | no                     | partial yes            | partial yes            |
| 5. Did the review authors perform study selection in duplicate?                                                                                                                                                           | yes                    | yes                    | yes                    | yes            | yes                    | yes                    | yes                    |
| 6. Did the review authors perform data extraction in duplicate?                                                                                                                                                           | yes                    | yes                    | yes                    | yes            | yes                    | yes                    | yes                    |
| <b>7. Did the review authors provide a list of excluded studies and justify the exclusions?</b>                                                                                                                           | no                     | no                     | no                     | yes            | yes                    | no                     | no                     |
| 8. Did the review authors describe the included studies in adequate detail?                                                                                                                                               | partial yes            | partial yes            | partial yes            | yes            | yes                    | partial yes            | yes                    |
| <b>9. Did the review authors use a satisfactory technique for assessing the risk of bias (RoB) in individual studies that were included in the review? (RCTs)</b>                                                         | yes                    | yes                    | no                     | yes            | yes                    | no                     | yes                    |
| 10. Did the review authors report on the sources of funding for the studies included in the review?                                                                                                                       | yes                    | yes                    | no                     | yes            | yes                    | no                     | no                     |
| <b>11. If meta-analysis was performed did the review authors use appropriate methods for statistical combination of results? (RCTs)</b>                                                                                   | yes                    | yes                    | yes                    | yes            | yes                    | yes                    | yes                    |
| 12. If meta-analysis was performed, did the review authors assess the potential impact of RoB in individual studies on the results of the meta-analysis or other evidence synthesis?                                      | no                     | yes                    | no                     | yes            | yes                    | no                     | yes                    |
| <b>13. Did the review authors account for RoB in individual studies when interpreting/ discussing the results of the review?</b>                                                                                          | no                     | yes                    | no                     | yes            | yes                    | no                     | no                     |
| 14. Did the review authors provide a satisfactory explanation for, and discussion of, any heterogeneity observed in the results of the review?                                                                            | yes                    | yes                    | yes                    | yes            | yes                    | yes                    | yes                    |
| <b>15. If they performed quantitative synthesis did the review authors carry out an adequate investigation of publication bias (small study bias) and discuss its likely impact on the results of the review?</b>         | yes                    | yes                    | yes                    | yes            | yes                    | yes                    | yes                    |
| 16. Did the review authors report any potential sources of conflict of interest, including any funding they received for conducting the review?                                                                           | yes                    | yes                    | yes                    | yes            | yes                    | yes                    | yes                    |
| Overall AMSTAR 2 rating                                                                                                                                                                                                   | Critically low quality | Critically low quality | Critically low quality | High quality   | Critically low quality | Critically low quality | Critically low quality |

\*Different focus than the present review (comparison of direct oral anticoagulants to vitamin-K antagonists, rather than a comparison of dual-pathway therapy to triple antithrombotic therapy).
